# Supplementary material
Source: publisher figshare collection journal article supplement (https://acs.figshare.com/ndownloader/files/27189263)
Supplement: Supplementary file 1 [file 27189263]

**Supporting Information for**

**Gate-Tunable Plasmon-Enhanced Photodetection in a Monolayer MoS<sub>2</sub>**

**Phototransistor with Ultrahigh Photoresponsivity**

Hao-Yu Lan,<sup>1</sup> Yu-Hung Hsieh,<sup>1,2</sup> Zong-Yi Chiao,<sup>1,3</sup> Deep Jariwala,<sup>4</sup> Min-Hsiung Shih,<sup>1</sup> Ta-Jen Yen,<sup>2</sup>  
Ortwin Hess,<sup>5,6</sup> and Yu-Jung Lu<sup>\*1,3</sup>

<sup>1</sup>*Research Center for Applied Sciences, Academia Sinica, Taipei 11529, Taiwan*

<sup>2</sup>*Department of Materials Science and Engineering, National Tsing Hua University, Hsinchu 30013, Taiwan*

<sup>3</sup>*Department of Physics, National Taiwan University, Taipei 10617, Taiwan*

<sup>4</sup>*Department of Electrical and Systems Engineering, University of Pennsylvania, Philadelphia, PA, USA*

<sup>5</sup>*Blackett Laboratory, Imperial College London, South Kensington Campus, SW7 2AZ London, United Kingdom*

<sup>6</sup>*School of Physics and CRANN Institute, Trinity College Dublin, Dublin 2, Ireland*

\*To whom correspondence should be addressed.

E-mail: [yujunglu@gate.sinica.edu.tw](mailto:yujunglu@gate.sinica.edu.tw)

**Table of contents**

**Section S1. Gold-mediated exfoliation**

**Section S2. Raman and PL spectra of the monolayer MoS<sub>2</sub>**

**Section S3. The measured optical constants of noble metal (Au, Ag, Al) films**

**Section S4. Full-Color palettes with varied size and period of Ag nanodisk arrays**

**Section S5. Reflection spectra of different Ag nanodisk arrays with varied disk size and period**

**Section S6. Calculated absorption spectra specifically for the monolayer MoS<sub>2</sub> layer**

**Section S7. Metrics of the reported TMD-based plasmonic photodetectors**

## Section S1. Gold-mediated exfoliation

Monolayer MoS<sub>2</sub> was prepared by a gold-mediated exfoliation method<sup>1</sup>. This advanced method starts with gold (Au) evaporation (~ 100 nm) on bulk MoS<sub>2</sub>. The interaction between Au and S atoms on the topmost layer is much stronger than that between the same layer and the bottom layer, thus enabling peel-off of the topmost layer by using thermal tape. The thermal tape is then released on a hot plate (=120°C) and cleaned by O<sub>2</sub> plasma treatment. The top Au film is etched by potassium iodide and iodine (KI/I<sub>2</sub>) wet etching, followed by a 10 min acetone and isopropyl alcohol (IPA) rinse to remove the etchant and the residues.

## Section S2. Raman and PL spectra of the monolayer MoS<sub>2</sub>

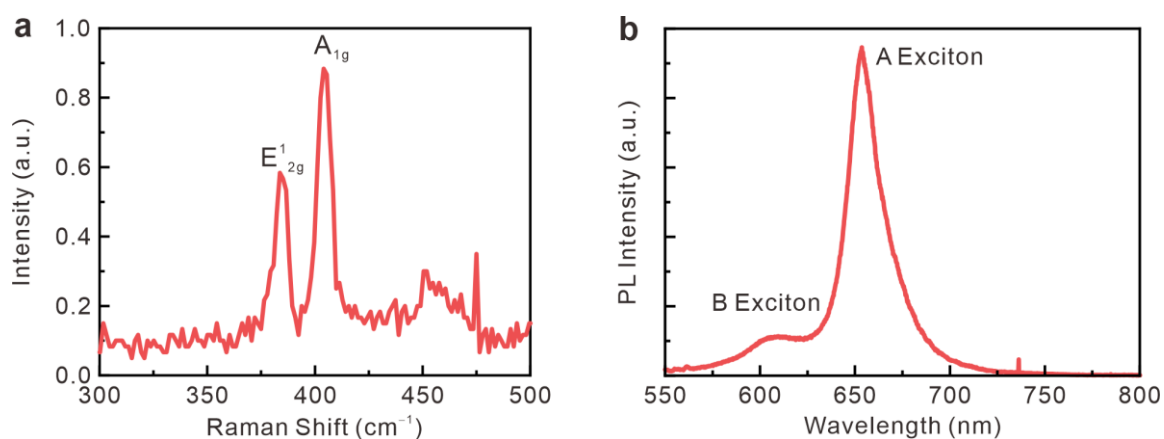

**Figure S1.** Material properties of monolayer MoS<sub>2</sub> obtained by gold-mediated exfoliation method. (a) Raman spectra and (b) photoluminescence (PL) spectra of monolayer MoS<sub>2</sub>.

### Section S3. The measured optical constants of noble metal (Au, Ag, Al) films

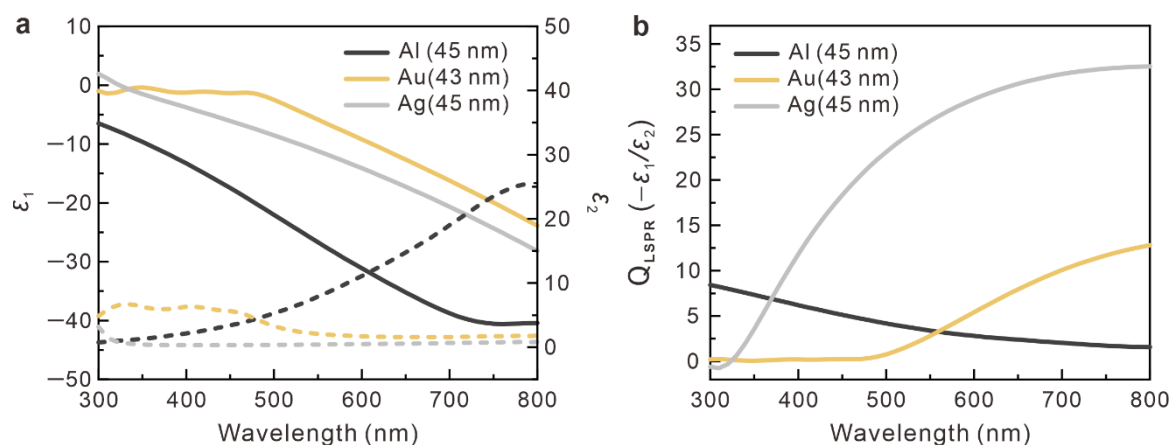

**Figure S2.** The measured optical constants of noble metal (Au, Ag, Al) films growth by thermal evaporation. The base pressure of the vacuum chamber is approximately  $3 \times 10^{-6}$  torr, and the deposition rate is approximately  $1 \text{ \AA s}^{-1}$ . (a) The optical constants of Al, Au, and Ag were measured by spectroscopic ellipsometry (VASE, J.A. Woollam Co.). The real (solid line) and imaginary (dashed line) parts of the dielectric function are used for the FDTD simulation. (b) Calculated quality factors of the localized surface plasmon resonance in spherical structures ( $Q_{LSPR}$ ). The results suggest that Ag is the best plasmonic material in the visible.

#### Section S4. Full-Color palettes with varied size and period of plasmonic Ag nanodisk arrays

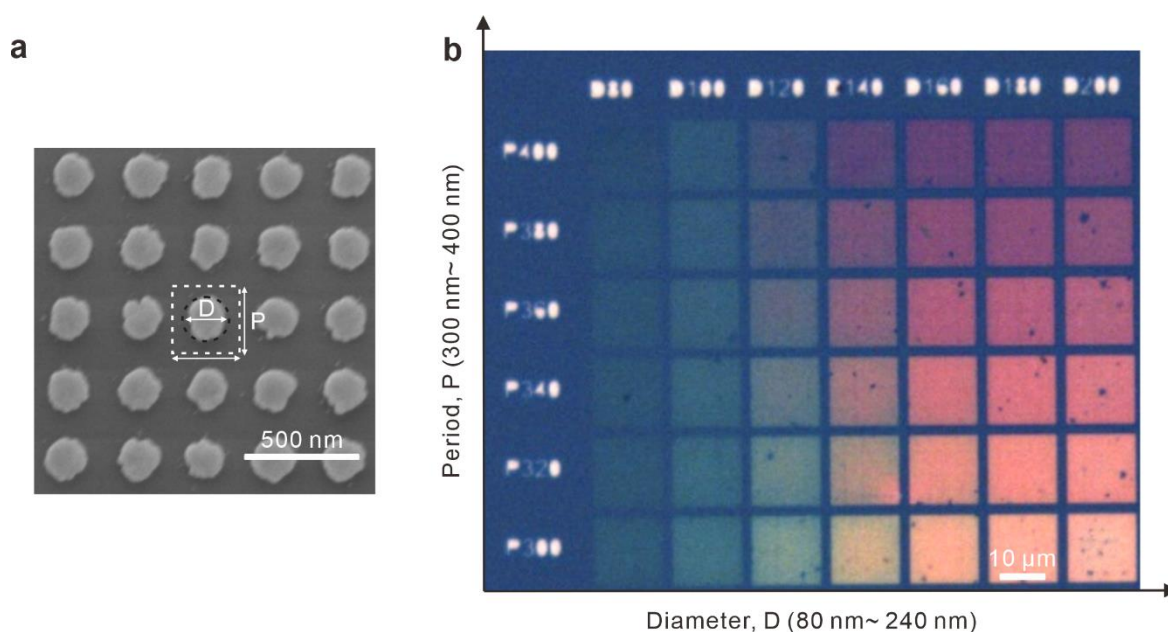

**Figure S3.** Full-color palettes with varied size and period of plasmonic Ag nanodisk (ND) arrays on SiO<sub>2</sub>/Si substrate. (a) SEM images of a fabricated AgND array with a diameter of 140 nm and a periodicity of 260 nm. (b) Optical image of the reflective colors from different AgND arrays with the designed disk size D= 80– 240 nm) and the designed period P= 220– 400 nm. The real size of the fabricated AgNDs is slightly larger than the designed size. The image was taken using a 20 $\times$  objective lens in microscope reflection mode under a white light illumination.

## Section S5. Reflection spectra of different Ag nanodisk arrays with varied disk size and period

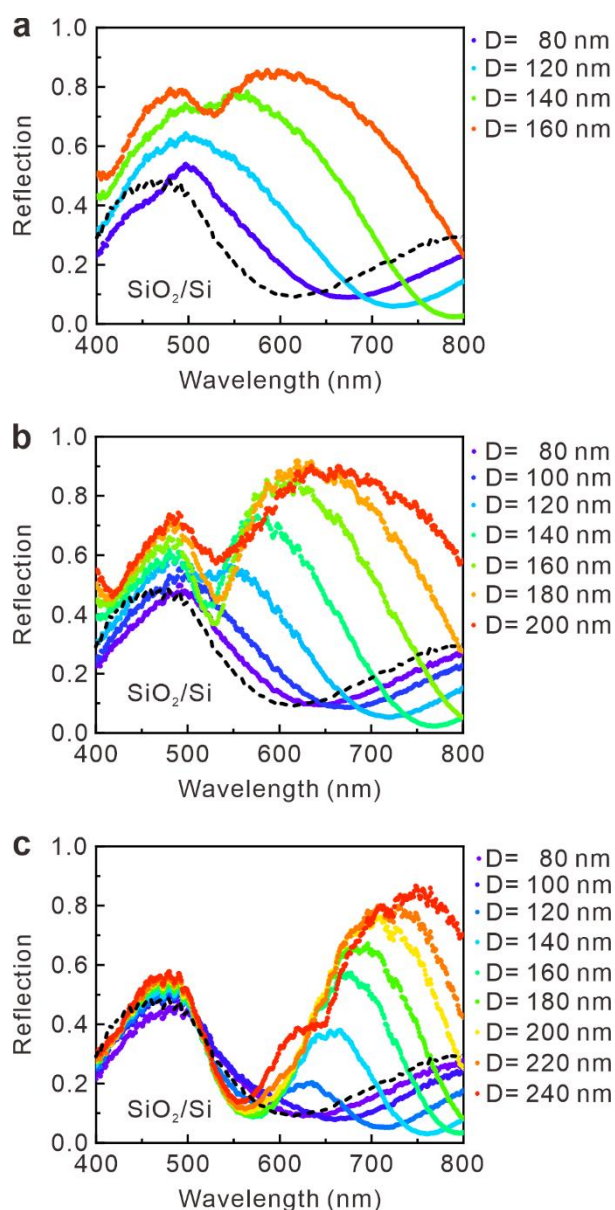

**Figure S4.** Measured reflection spectra of different Ag nanodisk (AgND) arrays with varied disk size and period on the  $\text{SiO}_2/\text{Si}$  substrate. (a) Experimentally measured reflection spectra from AgND arrays with a varied diameter of the AgND at a fixed period of  $P = 260$  nm. (b)  $P = 300$  nm. (c)  $P = 400$  nm. The black line shows the reflection spectra from the  $\text{SiO}_2/\text{Si}$  substrate. A clear redshift in the resonance peak with increasing diameter of AgND is strongly related to the localized surface plasmon resonance in the AgND arrays.

## Section S6. Calculated absorption spectra specifically for the monolayer MoS<sub>2</sub> layer

The simulation results of the monolayer MoS<sub>2</sub> absorbance were done with the commercial Lumerical FDTD software. In the simulation setup, a 300 nm silica layer was located on the silicon substrate. On top of the silica, the monolayer MoS<sub>2</sub> with a thickness of 0.7 nm was then defined. The permittivity of the monolayer MoS<sub>2</sub> was taken from the literature<sup>2</sup>. In the case of plasmonic enhancement, the silver nanodisk (diameter = 160 nm, height = 40 nm) was built on the monolayer MoS<sub>2</sub>. To construct the nanodisk arrays, periodic boundary conditions (period = 260 nm) were set in the x and y directions, while the PML boundaries were applied in the z direction, with a planewave source propagating in the same direction. The mesh for each simulation was set to be 1 nm in the x and y directions and 0.2 nm in the z direction. To obtain the absorbance of the monolayer MoS<sub>2</sub>, a field monitor and an index monitor were added to cover the entire region of the MoS<sub>2</sub> layer. The absorbance was then calculated by applying equation (1) and integrating through the volume of the MoS<sub>2</sub> monolayer.

$$Absorbance = \frac{1}{2} \times \varepsilon_0 \times \omega \times |E|^2 \times \varepsilon_{img} \quad (1)$$

where  $\varepsilon_0$ ,  $\omega$ ,  $E$ , and  $\varepsilon_{img}$  represent the permittivity of free space, the angular frequency, the normalized electric field (by the source), and the imaginary part of epsilon of the monolayer MoS<sub>2</sub>, respectively.

## Section S7. Metrics of the reported TMD-based plasmonic photodetectors

| Devices  | Material                  | Plasmonic Structure                   | Responsivity (A W <sup>-1</sup> ) | Detectivity (cm Hz <sup>1/2</sup> W <sup>-1</sup> ) | Decay Time (s) | Enhanced Ratio |
|----------|---------------------------|---------------------------------------|-----------------------------------|-----------------------------------------------------|----------------|----------------|
| PhotoFET | FL MoS <sub>2</sub>       | Au nanoparticles (SHINs) <sup>3</sup> | NA                                | NA                                                  | NA             | 2-3            |
|          | 1L MoS <sub>2</sub>       | Au nanoshells <sup>4</sup>            | ~0.87 mA W <sup>-1</sup> @630 nm  | NA                                                  | NA             | 1.5-3.5        |
|          | FL MoS <sub>2</sub>       | Au nanoparticles <sup>5</sup>         | ~ 2-3 mA W <sup>-1</sup> @632 nm  | NA                                                  | NA             | 2              |
|          | FL MoS <sub>2</sub>       | Au nanoarrays <sup>5</sup>            | ~ 2-3 mA W <sup>-1</sup> @632 nm  | NA                                                  | NA             | 3              |
|          | FL MoS <sub>2</sub>       | Au nanoarrays <sup>6</sup>            | 20 A W <sup>-1</sup> @ 466 nm     | $6 \times 10^{10}$                                  | 0.58 s         | 8.2            |
|          | <b>1L MoS<sub>2</sub></b> | <b>Ag nanoarrays (This work)</b>      | <b>~27000 A/W @ 620 nm</b>        | <b><math>1.3 \times 10^{12}</math></b>              | <b>0.4 s</b>   | <b>7.2</b>     |
| M-S-M PD | 1L MoS <sub>2</sub>       | Ag nanowires <sup>7</sup>             | 59.6 A/W @532 nm                  | $4.51 \times 10^{10}$                               | > 10 s         | 250            |
|          | 1L MoS <sub>2</sub>       | Ag nanoparticles (SHINs) <sup>8</sup> | 287.5 A/W @570 nm                 | NA                                                  | 15 s           | 8.8            |
|          | 1L MoS <sub>2</sub>       | Ag nanocubes <sup>9</sup>             | 7940 A/W @520 nm                  | NA                                                  | 1.6 s          | 38             |
|          | FL MoS <sub>2</sub>       | Au nanoparticles <sup>10</sup>        | 64 mA/W @980 nm                   | NA                                                  | 2.6 ms         | 14             |

**Table S1.** Device performance of the reported plasmonic-enhanced monolayer or multi-layer MoS<sub>2</sub> photodetectors.

## References

- (1) Desai, S. B.; Madhvapathy, S. R.; Amani, M.; Kiriya, D.; Hettick, M.; Tosun, M.; Zhou, Y.; Dubey, M.; Ager, J. W., 3rd; Chrzan, D.; Javey, A., Gold-mediated exfoliation of ultralarge optoelectronically-perfect monolayers. *Adv. Mater.* **2016**, *28*, (21), 4053–4058.
- (2) Bablu Mukherjee, F. T., Daniel Gunlycke, Kiran Kumar Amara, Goki Eda, and Ergun Simsek, Complex electrical permittivity of the monolayer molybdenum disulfide ( $\text{MoS}_2$ ) in near UV and visible. *Opt. Mater. Express* **2015**, *5*, (2), 447–455.
- (3) Lin, J.; Li, H.; Zhang, H.; Chen, W., Plasmonic enhancement of photocurrent in  $\text{MoS}_2$  field-effect-transistor. *Appl. Phys. Lett.* **2013**, *102*, (20), 203109.
- (4) Sobhani, A.; Lauchner, A.; Najmaei, S.; Ayala-Orozco, C.; Wen, F.; Lou, J.; Halas, N. J., Enhancing the photocurrent and photoluminescence of single crystal monolayer  $\text{MoS}_2$  with resonant plasmonic nanoshells. *Appl. Phys. Lett.* **2014**, *104*, (3), 031112.
- (5) Miao, J.; Hu, W.; Jing, Y.; Luo, W.; Liao, L.; Pan, A.; Wu, S.; Cheng, J.; Chen, X.; Lu, W., Surface plasmon-enhanced photodetection in few layer  $\text{MoS}_2$  phototransistors with Au nanostructure arrays. *Small* **2015**, *11*, (20), 2392–2398.
- (6) Lee, S.; Park, J.; Yun, Y.; Lee, J.; Heo, J., Enhanced photoresponsivity of multilayer  $\text{MoS}_2$  phototransistor using localized Au schottky junction formed by spherical-lens photolithography. *Adv. Mater. Interfaces* **2019**, *6*, (8), 1900053.
- (7) Bang, S.; Duong, N. T.; Lee, J.; Cho, Y. H.; Oh, H. M.; Kim, H.; Yun, S. J.; Park, C.; Kwon, M. K.; Kim, J. Y.; Kim, J.; Jeong, M. S., Augmented quantum yield of a 2D monolayer photodetector by surface plasmon coupling. *Nano Lett.* **2018**, *18*, (4), 2316–2323.
- (8) Wu, Z. Q.; Yang, J. L.; Manjunath, N. K.; Zhang, Y. J.; Feng, S. R.; Lu, Y. H.; Wu, J. H.; Zhao, W. W.; Qiu, C. Y.; Li, J. F.; Lin, S. S., Gap-mode surface-plasmon-enhanced photoluminescence and photoresponse of  $\text{MoS}_2$ . *Adv. Mater.* **2018**, *30*, (27), e1706527.
- (9) Sun, B.; Wang, Z.; Liu, Z.; Tan, X.; Liu, X.; Shi, T.; Zhou, J.; Liao, G., Tailoring of silver nanocubes with optimized localized surface plasmon in a gap mode for a flexible  $\text{MoS}_2$  photodetector. *Adv. Funct. Mater.* **2019**, *29*, (26), 1900541.
- (10) Guo, J.; Li, S.; He, Z.; Li, Y.; Lei, Z.; Liu, Y.; Huang, W.; Gong, T.; Ai, Q.; Mao, L.; He, Y.; Ke, Y.; Zhou, S.; Yu, B., Near-infrared photodetector based on few-layer  $\text{MoS}_2$  with sensitivity enhanced by localized surface plasmon resonance. *Appl. Surf. Sci.* **2019**, *483*, 1037–1043.
